# Supplementary material
Source: Springer Nature journal article supplement (https://www.springermedizin.de/resource/supplementary/12887_2014_1083_MOESM1_ESM.pdf/9476468)

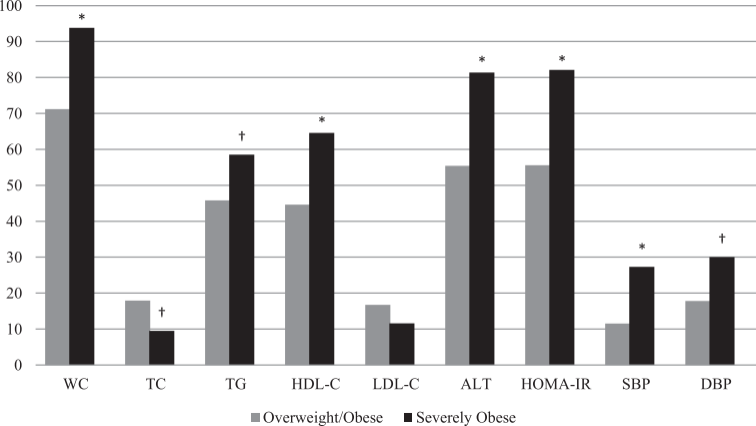

Supplement: MOESM1 [file 9476468]
